# Supplementary material
Source: publisher figshare collection journal article supplement (https://diabetesjournals.figshare.com/ndownloader/files/26798633)

**Supplemental Figure 1 Patient disposition**

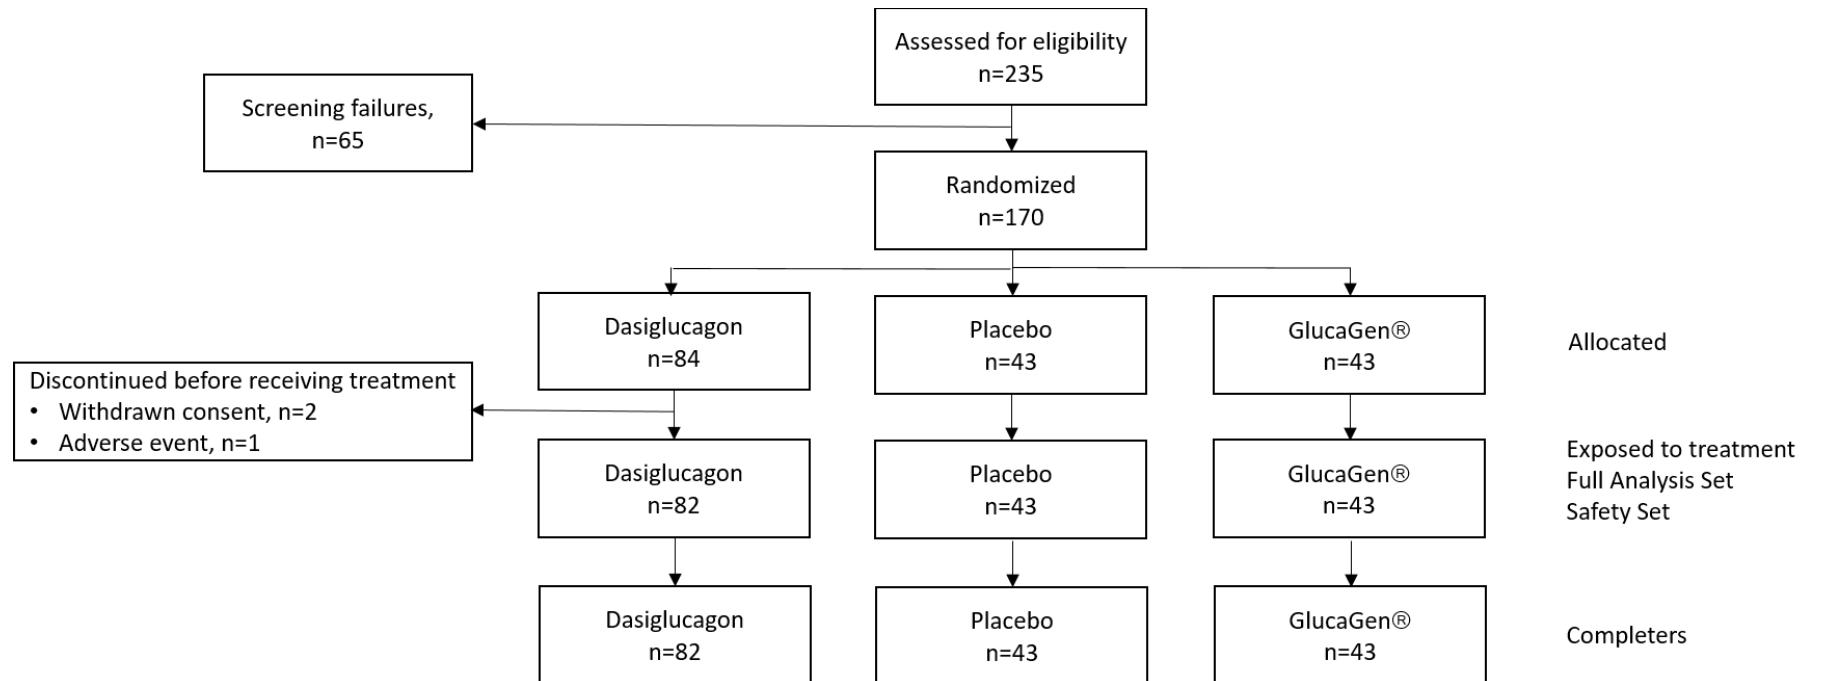

Supplement: Supplementary file 1 [file 26798633]
